# Supplementary material for: Fragmentation and inefficiencies in US equity markets: Evidence from the Dow 30
Source: PLOS journal article supplement (doi:10.1371/journal.pone.0226968), 2020-01-22
Supplement: S6 (10.1371/journal.pone.0226968.s006) [file journal.pone.0226968.s006]

| Data Provider               | Feed(s)        | One-time Cost | Monthly Fee |
|-----------------------------|----------------|---------------|-------------|
| CTA                         | CQS, CTS       |               | \$1,850     |
| UTP                         | UQDF, UTDF     |               | *\$2,500    |
| NYSE                        | Integrated     |               | \$7,500     |
|                             | Historical     | \$60,000      |             |
| NYSE ARCA                   | Integrated     |               | \$3,000     |
|                             | Historical     | \$36,000      |             |
| NYSE MKT                    | Integrated     |               | \$2,500     |
| (Now NYSE American)         | Historical     | \$18,000      |             |
| National Stock Exchange NSX | Integrated     |               | \$0         |
| (Now NYSE National)         | Historical     |               | *\$1,500    |
| NASDAQ                      | TotalView-ITCH |               | *\$25,000   |
|                             | Historical     |               | *\$1,250    |
| NASDAQ BX                   | TotalView-ITCH |               | *\$20,000   |
|                             | Historical     |               | *\$500      |
| NASDAQ PSX                  | TotalView-ITCH |               | *\$17,000   |
|                             | Historical     |               | *\$500      |
| BATS BZX                    | Depth          |               | \$2,000     |
|                             | Historical     | \$8,500       |             |
| BATS BYX                    | Depth          |               | \$2,000     |
|                             | Historical     | \$8,500       |             |
| Direct Edge EDGA            | Depth          |               | \$1,000     |
|                             | Historical     | \$8,500       |             |
| Direct Edge EDGX            | Depth          |               | \$2,000     |
|                             | Historical     | \$8,500       |             |
| The Investors Exchange      | TOPS           | \$0           | \$0         |
|                             | DEEP           | \$0           | \$0         |
|                             | Historical     | \$0           | \$0         |
| Chicago Stock Exchange      | CHX Book       | \$0           | \$0         |
| (Now NYSE Chicago)          | Historical     |               |             |
| Total                       |                | \$148,000     | \$91,100    |

**S2 Table. A Survey of Data Fees.** The pricing presented in this table assumes a single consumer with an academic use case aiming to construct a dataset similar to what was used in this analysis. It also assumes that non-display fees do not apply. Historical data costs assume a 12 month period of interest, i.e. calendar year 2016. Strictly speaking, historical data may be sufficient for replicating the analysis presented in this paper, making subscription to live feeds unnecessary. However, utilizing historical data provided by each exchange excludes the possibility of collecting data from a single point of observation, reintroducing the issues of clock synchronization and relativity. Additionally, highlighting the monthly cost for comprehensive direct feed access shines a light on one of the reasons for the lack of academic participation in the analysis of modern U.S. stock markets. This does not include costs which may be incurred while curating the data, fulfilling potential co-location requirements, ISP/networking costs, computing hardware acquisition and maintenance, etc. DoB indicates that a product contains full Depth of Book information (adds, mod, and cancel messages), while ToB indicates that a product contains only Top of Book information (trade and quote messages). The NYSE Historical ToB product, also called NYSE Daily TAQ, is frequently used in academic studies due to its relatively low cost and broad coverage (e.g. [?] use this product). Historical data from CHX is not directly available, and the live feeds are transitioning to NYSE technology, thus historical CHX data must be purchased from a third party. This list is not guaranteed to be comprehensive, additional fees/costs may exist. \*Access to UTP data and NASDAQ direct feed data may be granted freely to academic institutions, see UTP Feed Pricing and NASDAQ Academic Waiver Policy for more info. \*\*Historical data purchased from NYSE only covers 5/21/2018 - present for NYSE National, thus an alternative data provider is required in order to obtain historical data from 2016. The sources used to construct this table include CTA feed pricing, UTP feed pricing via the Data Policies document, NYSE feed pricing, NYSE historical data pricing, NASDAQ feed pricing, BATS/DirectEdge feed pricing, and CHX feed pricing.
