# Supplementary material for: Fragmentation and inefficiencies in US equity markets: Evidence from the Dow 30
Source: PLOS journal article supplement (doi:10.1371/journal.pone.0226968), 2020-01-22
Supplement: S9 (10.1371/journal.pone.0226968.s009) [file journal.pone.0226968.s009]

| timestamp                  | exchange | price | shares | direct_bid | direct_ask | sip_bid | sip_ask | roc |
|----------------------------|----------|-------|--------|------------|------------|---------|---------|-----|
| 2016-01-07 09:48:55.398272 | 5        | 99.12 | 100    | 99.16      | 99.17      | 99.12   | 99.14   | -4  |
| 2016-01-07 09:48:55.398386 | 5        | 99.13 | 100    | 99.16      | 99.17      | 99.13   | 99.15   | -3  |
| 2016-01-07 09:48:55.398444 | 5        | 99.14 | 100    | 99.16      | 99.17      | 99.14   | 99.15   | -2  |
| 2016-01-07 09:48:55.398532 | 5        | 99.14 | 50     | 99.16      | 99.17      | 99.14   | 99.15   | -1  |
| 2016-01-07 09:48:55.398560 | 5        | 99.14 | 100    | 99.16      | 99.17      | 99.14   | 99.14   | -2  |

**S5 Table. Example AAPL Trades with Negative ROC.** A subset of the trades that occurred during a dislocation in AAPL on 2016-01-07 at approximately 9:48am that resulted in negative ROC. Negative ROC indicates that these trades executed at less favorable prices than what was offered by the DBBO.
